# Supplementary material
Source: MDPI journal article supplement (https://www.mdpi.com/2071-1050/13/15/8169)
Supplement: s1 [file s1]

**Table S1. Preventable and non-preventable causes of death classification and its ICD-10 codes.**

|                  | Causes of death                                                  | ICD-10 codes                   | Typology |
|------------------|------------------------------------------------------------------|--------------------------------|----------|
| Preventable      | Cancer of oral cavity, pharynx, and esophagus                    | C00-C15                        | B/M      |
|                  | Cancer larynx                                                    | C32                            | B/M      |
|                  | Cancer of trachea, bronchus, and lung                            | C33-C34                        | B/M      |
|                  | Diabetes Mellitus                                                | E10-E14                        | B/M      |
|                  | Chronic Obstructive Pulmonary Disease                            | J40-J44, J47                   | B/M      |
|                  | Cancer of breast                                                 | C50                            | M        |
|                  | Cancer of prostate                                               | C61                            | M        |
|                  | Hodgkin's disease and leukemia                                   | C81, C91-C95                   | M        |
|                  | Appendicitis, hernia, and peptic ulcer                           | K25–K28, K35–K38, K40–K46, K56 | M        |
|                  | Cancer of cervix                                                 | C53                            | B/M      |
|                  | Hypertensive disease                                             | I10-I15                        | B/M      |
|                  | Ischemic heart disease                                           | I20-I25                        | B/M      |
|                  | Cerebrovascular disease                                          | I60-I69                        | B/M      |
|                  | Road traffic accidents                                           | V01-V89, Y85                   | I        |
|                  | Accidental falls                                                 | W00-W19                        | I        |
|                  | Suicide                                                          | X60-X84, Y87.0                 | I        |
|                  | Mental and behavioral disorders due to use of psychotropic drugs | F10, F11-F16, F18, F19         | A        |
|                  | Alcoholic cardiomyopathy                                         | I42.6                          | A        |
|                  | Pancreatitis                                                     | K85-K86.0                      | A        |
|                  | Certain infectious and parasitic diseases                        | A00-B99, R75, U04.9            | IP       |
| Less Preventable | Cancer of stomach                                                | C16                            | N        |
|                  | Cancer of colorectum                                             | C18-C21                        | N        |
|                  | Cancer of liver                                                  | C22.0, C22.1, C22.9            | N        |
|                  | Cancer of kidney and bladder                                     | C64-C68                        | N        |
|                  | Cancer of pancreas                                               | C25                            | N        |
|                  | Other liver and gallbladder diseases                             | K71-K79, K84, K86.1-K87        | N        |
| Total mortality  | All causes of death                                              | All-Codes from ICD-10          |          |

Adapted from Mackenbach et al. (2015). **B/M**= Prevention through behavioral change + medical intervention; **B**=Prevention through behavioral change; **M**= Prevention by medical intervention; **I**=injuries; **A**= related to the consumption of alcohol and other substances; **P**= Poisoning; **IP**= infectious and parasitic diseases; **N**=No preventable causes of death.

Mackenbach, J. P., Kulhánová, I., Bopp, M., Deboosere, P., Eikemo, T. A., Hoffmann, R., ... & EURO-GBD-SE Consortium. (2015). Variations in the relation between education and cause-specific mortality in 19 European populations: A test of the “fundamental causes” theory of social inequalities in health. *Social Science & Medicine*, 127, 51-62.

**Table S2. Intervention areas selected by program combination and cities**

| program combination | City                  | Name of the vulnerable neighbourhood              | census tracts selected |                    |
|---------------------|-----------------------|---------------------------------------------------|------------------------|--------------------|
|                     |                       |                                                   | N                      | Mean of population |
| ARB                 | Alcalá de Guadaíra    | Centro Urbano - Castillo Alcalá                   | 2                      | 891                |
|                     |                       | El Castillo - Centro - Panaderos                  | 2                      | 1173               |
|                     | Cádiz                 | Balón-Hospital de Mujeres                         | 6                      | 1256               |
|                     |                       | Centro-San Carlos                                 | 8                      | 1249               |
|                     |                       | Mentidero-Falla                                   | 5                      | 1157               |
|                     |                       | Viña-Callejones                                   | 10                     | 910                |
|                     | Córdoba               | Axarquía                                          | 3                      | 1569               |
|                     | Granada               | Albaicín                                          | 3                      | 1030               |
|                     | Jerez de la Frontera  | Barriada España                                   | 1                      | 1057               |
|                     |                       | San Miguel-Vallesequillo                          | 5                      | 901                |
|                     |                       | Santiago-La Plata                                 | 3                      | 965                |
|                     | Málaga                | Ciudad Jardín Sur-Los Naranjos-Las Flores-Pinares | 2                      | 1380               |
|                     | Sanlúcar de Barrameda | Casco de Sanlúcar                                 | 8                      | 1302               |
|                     |                       | El Pino                                           | 1                      | 916                |
| ARB+URBAN           | Cádiz                 | Centro-San Carlos                                 | 2                      | 993                |
|                     |                       | San Juan-Pópulo-Santa María                       | 10                     | 742                |
|                     | Granada               | Albaicín                                          | 2                      | 722                |
|                     | Jaén                  | San Juan                                          | 7                      | 1334               |
|                     | Málaga                | Casco Histórico Oeste                             | 3                      | 827                |
|                     |                       | El Ejido-Lagunillas-La Victoria                   | 3                      | 734                |
|                     | Sevilla               | Casco Norte                                       | 10                     | 1157               |
| ARB+ZNTS            | Alcalá de Guadaíra    | El Castillo - Centro - Panaderos                  | 2                      | 720                |
|                     | Algeciras             | La Piñera                                         | 6                      | 1176               |
|                     | Almería               | Chanca-San Cristóbal                              | 1                      | 1214               |
|                     |                       | Colonia Morato-Chanca                             | 5                      | 1075               |
|                     |                       | El Puche                                          | 3                      | 1443               |
|                     | Córdoba               | Sector Sur                                        | 4                      | 1088               |
|                     | Granada               | Almanjáyar                                        | 2                      | 1847               |
|                     |                       | Cartuja                                           | 5                      | 1503               |
|                     |                       | La Paz-Rey Badis                                  | 5                      | 1216               |
|                     | Málaga                | El Ejido-Lagunillas-La Victoria                   | 1                      | 1174               |
|                     |                       | La Goleta-San Felipe Neri-La Merced               | 3                      | 1229               |
| ARB+ZNTS+URBAN      | Huelva                | Marismas del Odiel- Colonias                      | 3                      | 1123               |
|                     | Málaga                | Casco Histórico Oeste                             | 1                      | 1096               |
|                     |                       | La Goleta-San Felipe Neri-La Merced               | 1                      | 714                |
|                     | Sevilla               | La Oliva                                          | 4                      | 1471               |
|                     |                       | Las Letanías- Paz y Amistad                       | 6                      | 1280               |
|                     |                       | Las Vegas                                         | 3                      | 1316               |
|                     |                       | Murillo- Antonio Machado                          | 10                     | 1324               |

**Table S3. Population of the cities considered according to 2001 census data.**

| <b>City</b>           | <b>2001 inhabitants</b> |
|-----------------------|-------------------------|
| Alcalá de Guadaira    | 57426                   |
| Algeciras             | 101468                  |
| Almería               | 166328                  |
| Cádiz                 | 133363                  |
| Córdoba               | 308072                  |
| Granada               | 240661                  |
| Huelva                | 142284                  |
| Jaén                  | 112590                  |
| Jerez de la Frontera  | 183273                  |
| Málaga                | 524414                  |
| Sanlúcar de Barrameda | 60254                   |
| Sevilla               | 684633                  |
